# Supplementary material for: Spatial constraints on chromosomes are instrumental to meiotic pairing
Source: PubMed Central journal article supplement (PMC7725606; doi:10.1242/jcs.253724), 2020-11-30
Supplement: joces-133-253724-s1.pdf [file joces-133-253724-s1.pdf]

**Fig. S1. *melg* mutant phenotypes.** (A) DAPI-stained meiotic time courses of *melg1-3Δ* mutants. In all mutants, the maximum (Max.) length of the elongated germline nucleus is less than the length of the cell, but nuclear shortening and chromosome condensation at diplonema to metaphase I occur normally (compare with the WT in Fig. 1). The *melg1Δ* and *melg3Δ* mutants undergo anaphase I normally, but lagging chromosomes (arrows) are seen in *melg2Δ*. (B,C) DSBs are formed in the *melg1-3Δ* mutants. (B) Dmc1 foci (a marker of DSBs under repair) are present in the *melg* mutants but absent in the *spo11Δ* mutant. (High-detergent treatment prior to fixation removes free Dmc1. Signals in the somatic nuclei are due to cross reaction of the anti-Dmc1 antibody with Rad51.) (C) UV irradiation (UV-C, 254 nm; 50 Joule/m<sup>2</sup>) does not restore nuclear elongation in the *melg* mutants, but does so in the *spo11Δ* mutant by inducing DNA damage. Bars: 10 μm.

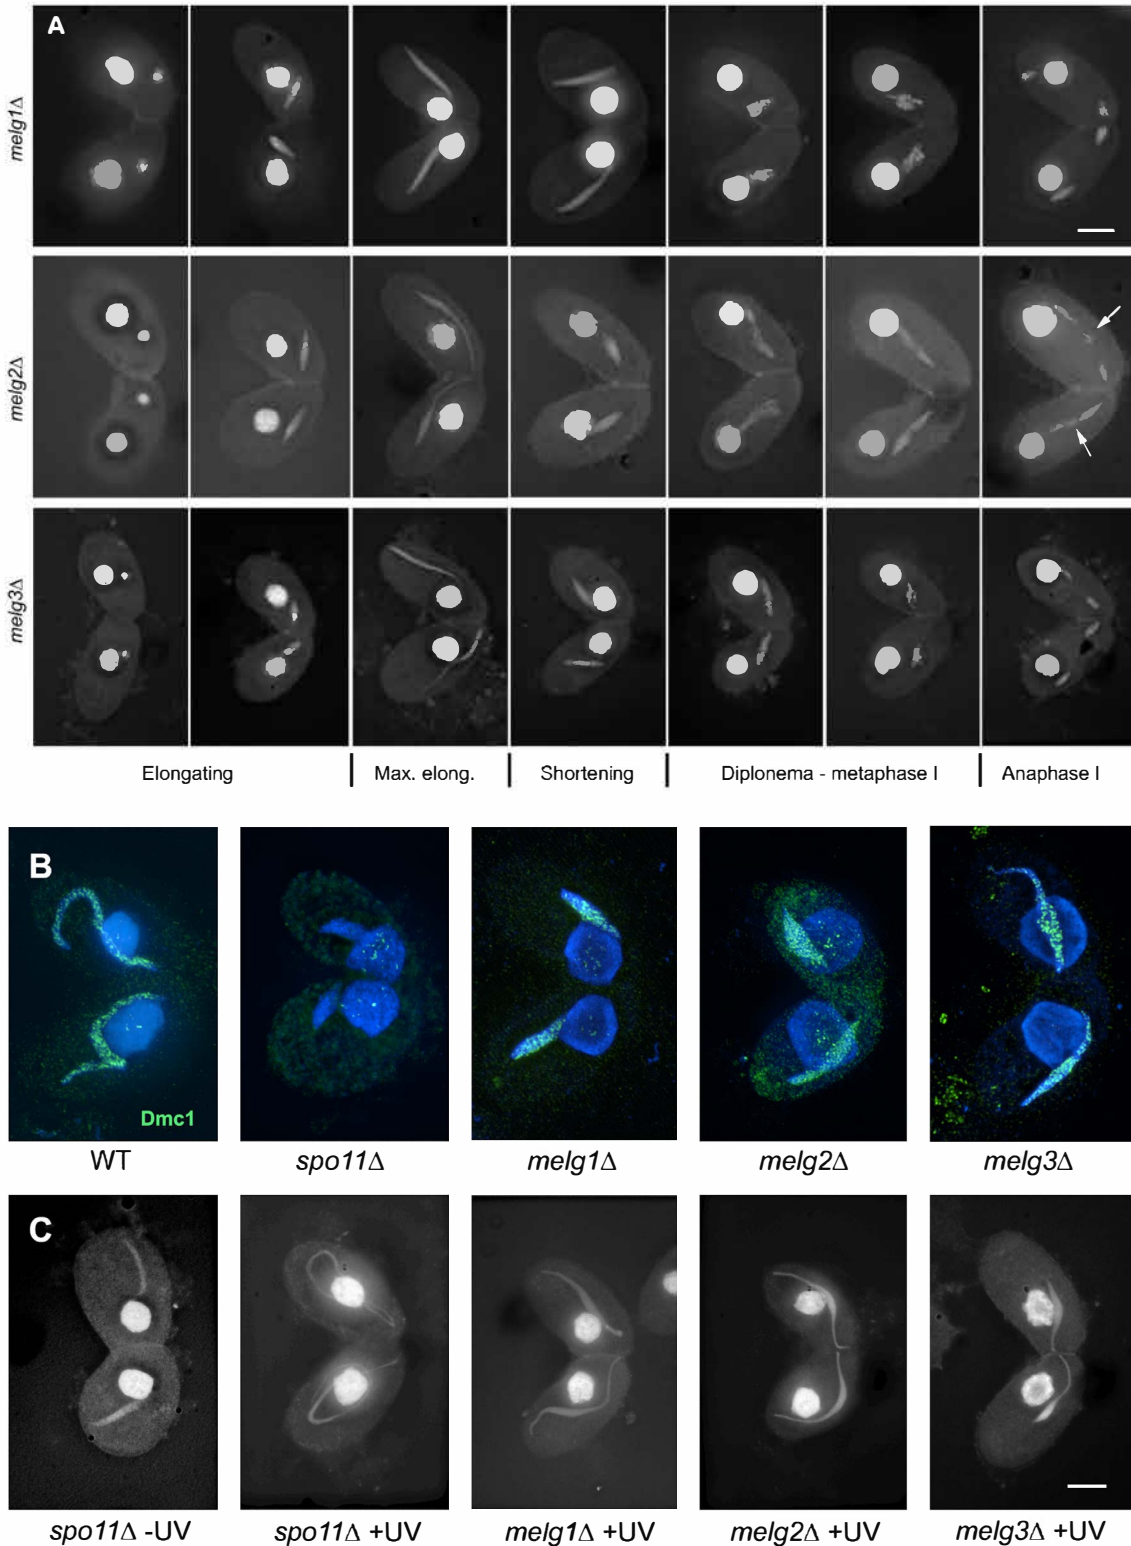

**Fig. S2. Late-stage defects in *melg2Δ*.** (A) Schematic representation of late meiotic stages in sexual reproduction of WT *Tetrahymena*. For stages up to metaphase I, see Fig. 1A. (B-F) DAPI-stained WT, (G-K) DAPI-stained mutant. (B,G) Interkinesis in the mutant looks similar to that in the WT, except for different nuclear sizes (arrows) due to nondisjoining chromosomes in anaphase I. (C,H,I) Anaphase II is highly disturbed in the mutant compared with the WT. (D,J) In the WT, gametic nuclei (the products of post-meiotic mitosis) migrate to the conjugation junction, pass through membrane pores and fertilize the stationary gametic nucleus of the other cell; in contrast, in the absence of intact gametic nuclei, the somatic nucleus in the mutant becomes abnormally stretched toward the conjugation junction (for comparison, see Akematsu et al., 2020, iScience 23, 100749). (E,F,K) Finally, in the WT, zygotic nuclei (the products of reciprocal fertilization) divide and differentiate into new germline (MIC) and somatic (MAC) nuclei, whereas the old somatic nuclei degenerate. In the mutant, new nuclei do not develop and the old somatic nuclei are retained. Bar: 10  $\mu$ m.

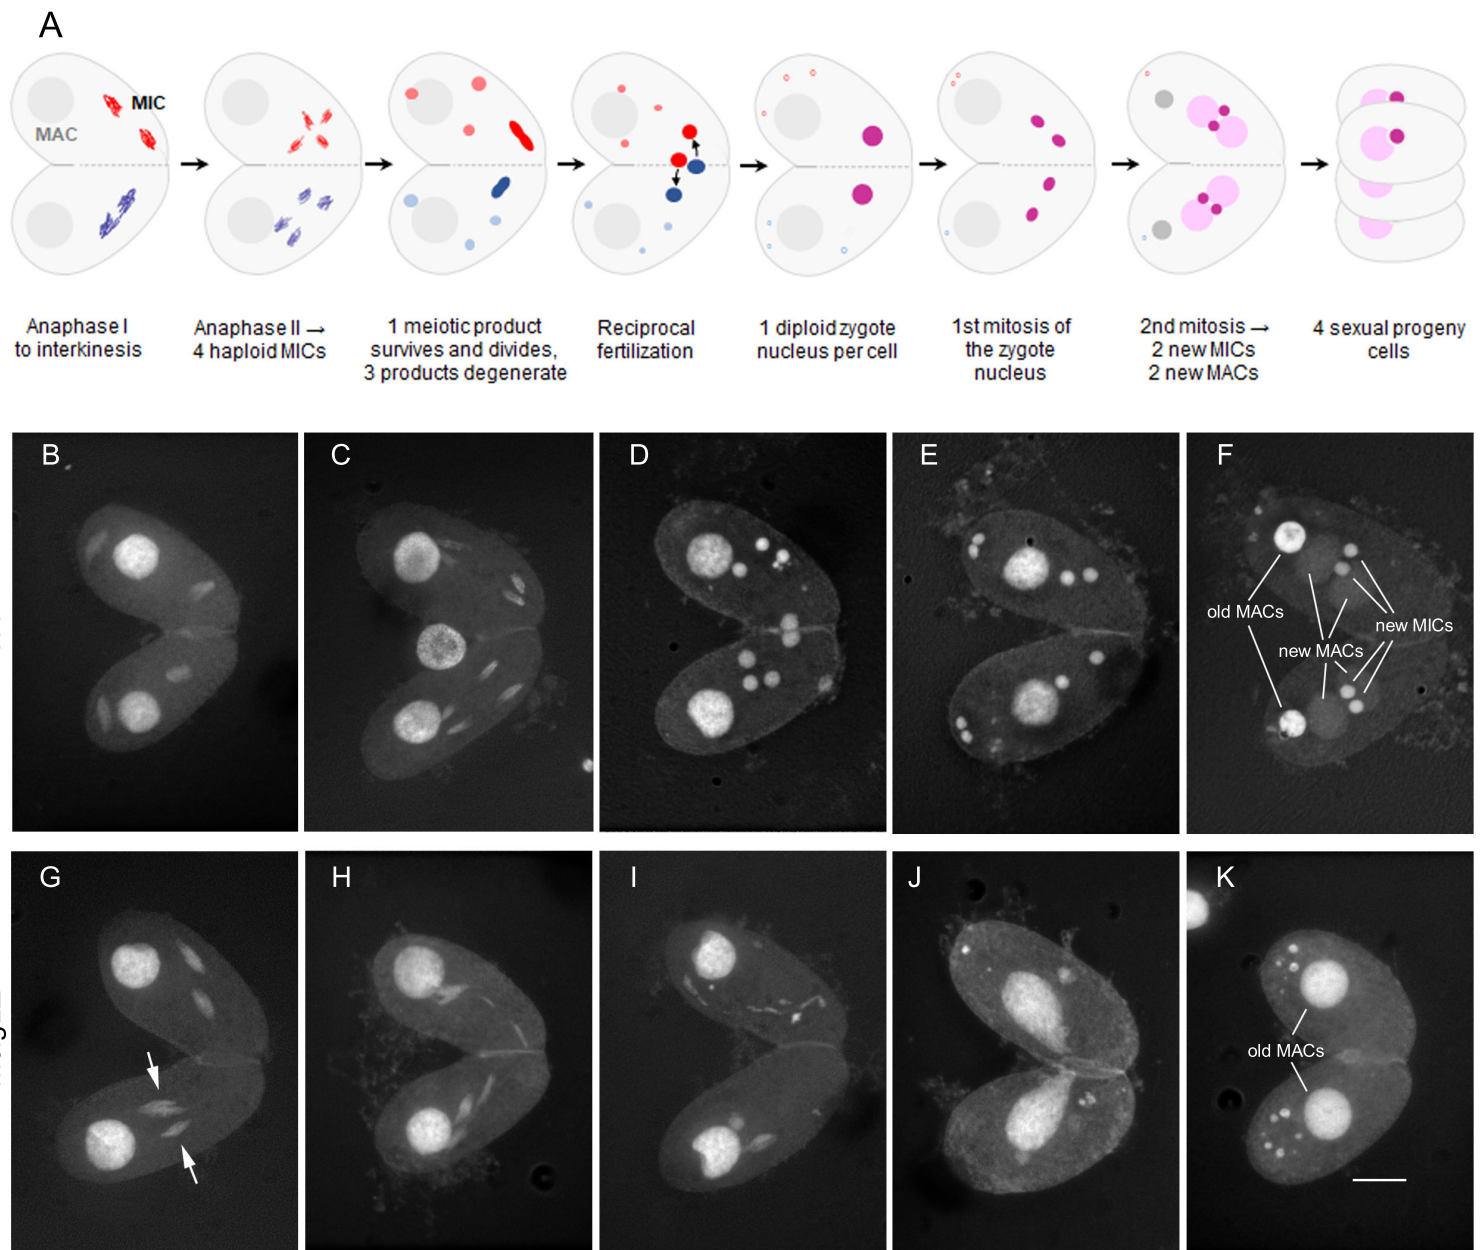

## Fig. S3

**Gene and protein sequences.** (A) Melg1 has a ribonuclease inhibitor-like leucine-rich repeats domain (LRR-RI, aa 118 – 261, NCBI BLASTP E-value: 2.73 e-4). This domain is commonly found in ribonuclease inhibitors and Ran GTPase activating proteins (Matsushima et al., 2010, BMC Microbiol. 10, 235). (B) The MELG1 gene has only phase 2 introns and contains multiple 90-bp exon arrays, which are characteristic of young genes created by recent ectopic recombination and/or retrotransposition (Xiong et al. 2019, PLoS Biol. 17, e3000294). (C) MELG3 gene and Melg3 protein sequences. Melg3 is encoded by the gene THERM\_000365339, which is incorrectly annotated in the current TGD (<http://ciliate.org/>, release 2020). Based on the transcript sequence (gene\_000025916 in TetraFGD (Xiong et al., 2013), we identified an ORF encoding a protein with 298 amino acids.

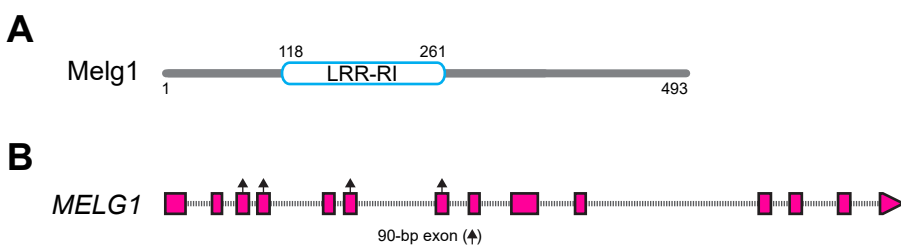

## C

>MELG3

```

ATGGATTAATAGAATATGAGTTTTCAACAATTGTCTCCTAGATCTCACCTATTTA-
AAGCTAAGATGACACATATAAGAAATATCCTTAAGGAAATAGAAAGTAATTACGGAACCAACTCTAATGAAAAAACC AAAAATTAGAACAGTGAAAA
AAATTACTTCGATAACGCTTTGGAATAATCTATTACATATTAGATGGGTTTTAGTGGCCTATAAGGAATATCAACATTAATACTATGAAAGATATCT
GGTATTAAACTGAGAAATATAAATTTAAATTATTTAAAAATCTAATCAAAATGATCTTTTACAAAAGATACTCTAAAATGATTTAGAAATATGATGA
AATAGCCAAAATAATTATTATCTTAAGTACAACAAGTTAGTCTGATAAAATATATGAAAACCTTTGGATTTCTTCTCAATCTTTTGCTAATTGAAAAG
TTAAATTAGCTTAAAAAACAGATTAGCTTGGGGTTCAGAGATGAAAGTCATTCAATCTAAAGTTAATTAATGTATTTTATCGAAAAATAATTAAT
CTCTGAAAAATCTAAGCTTACACCTCTACTTTCCCATCCTTATAGAAGATTTAAGGACAGCATTAGAATTTTCATCTACATATAATATCTAGCCCATT
GAAAATTATATTTTAAACATCTTTCCAGACGATTGACAATTTGGCAGACATTTTGATTTAGTTCTTCTAACTTTCTATCCCTTCAAATAAAATGCT
GAAAATATTATCACTTAAGAGCACTTAACTACTTTTAAAGTTCTCATTAAGAAGCTTATTACATATCTTTACTTTCCAAAAAATATTTAATCATATG
ACTTATATAATATGGTTAGTTATATCATAAGATAGGTTCTTCTACTTATTTAAATTTAATATGA
    
```

>Melg3

```

MDQQNMSFSTIVSQISPIQSQDDTYKNILKEIESNYGTNSNEKTKNQNSEKLLRQRFGI I-
YYILDGFQWPPIRNININTMKDIWYQTEKYKFQIIQKSNQNDLLQKILQNDLEYDEIAKII IILSTTSQSDKIYENFGFLNLLLLIEKLNQLKKQISL
GFRDESHSIQSQLNVFLSKI I KSLKNSLHLYFPILIEDLRTALEFHLHI I SSPLKI IFQTSFQTI DNLDILI QFFQLSYPFKQNAENI ITQEHFN
YFQVLIKELITYLYFPKNIQSYDLYNMVSYIIRQVLPYQNL I
    
```

**Fig. S4. Examples of wild type meiotic cells treated with LiCl<sub>2</sub>.**  
LiCl<sub>2</sub> (25 mM) was added at 2 h after meiotic induction; cells were fixed at 3.5 h after meiotic induction and stained with DAPI. Incompletely elongated meiotic nuclei resemble those of the *meig2*Δ mutant as shown in Fig. 2 and Fig. S1.  
Bar: 10 μm.

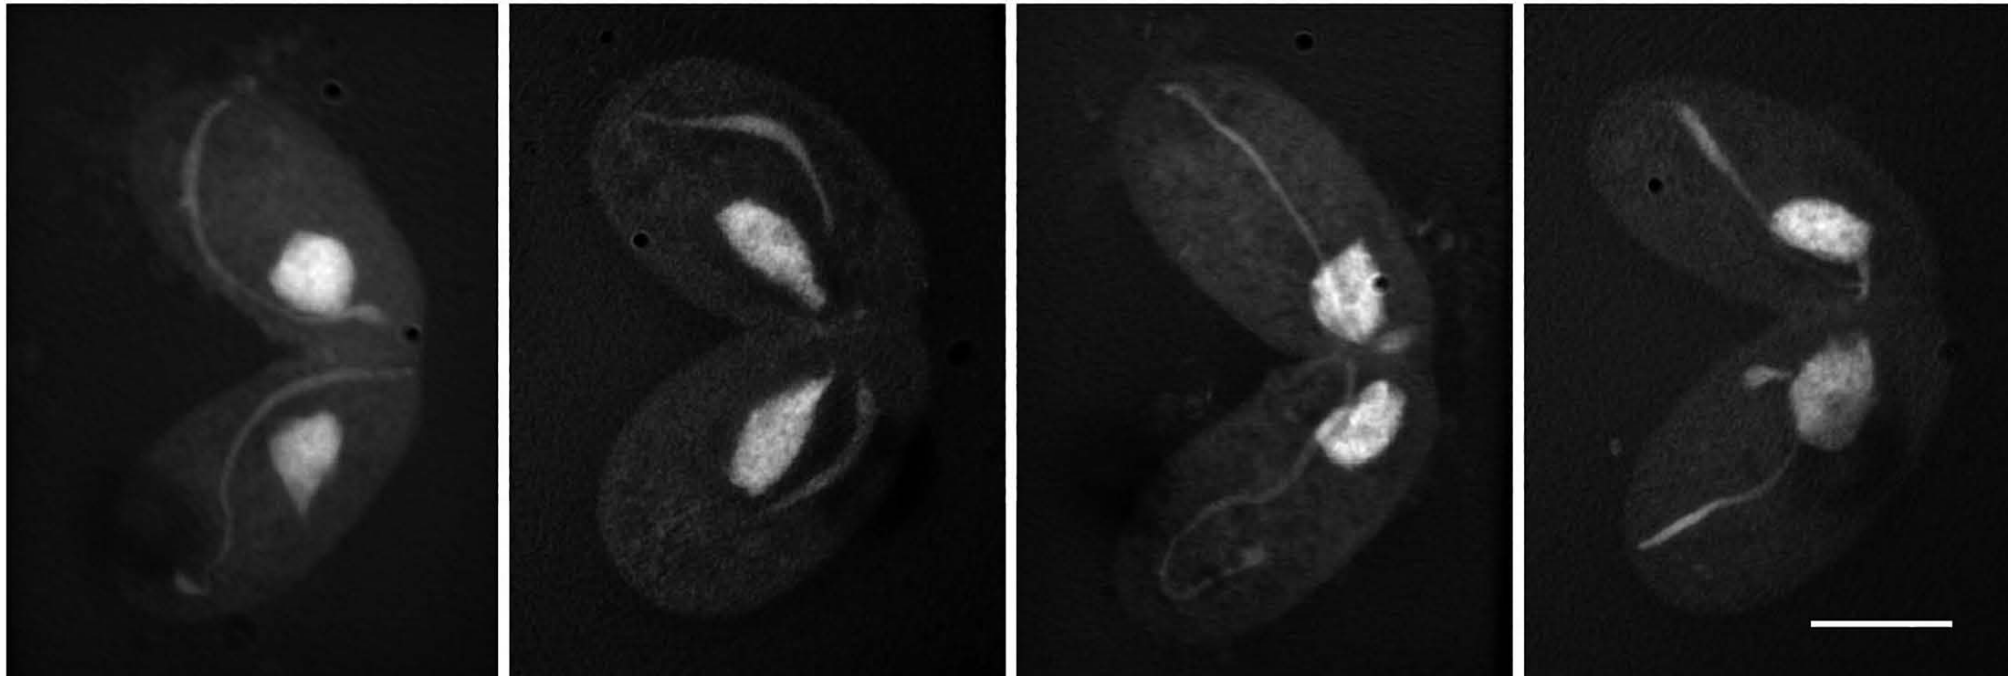

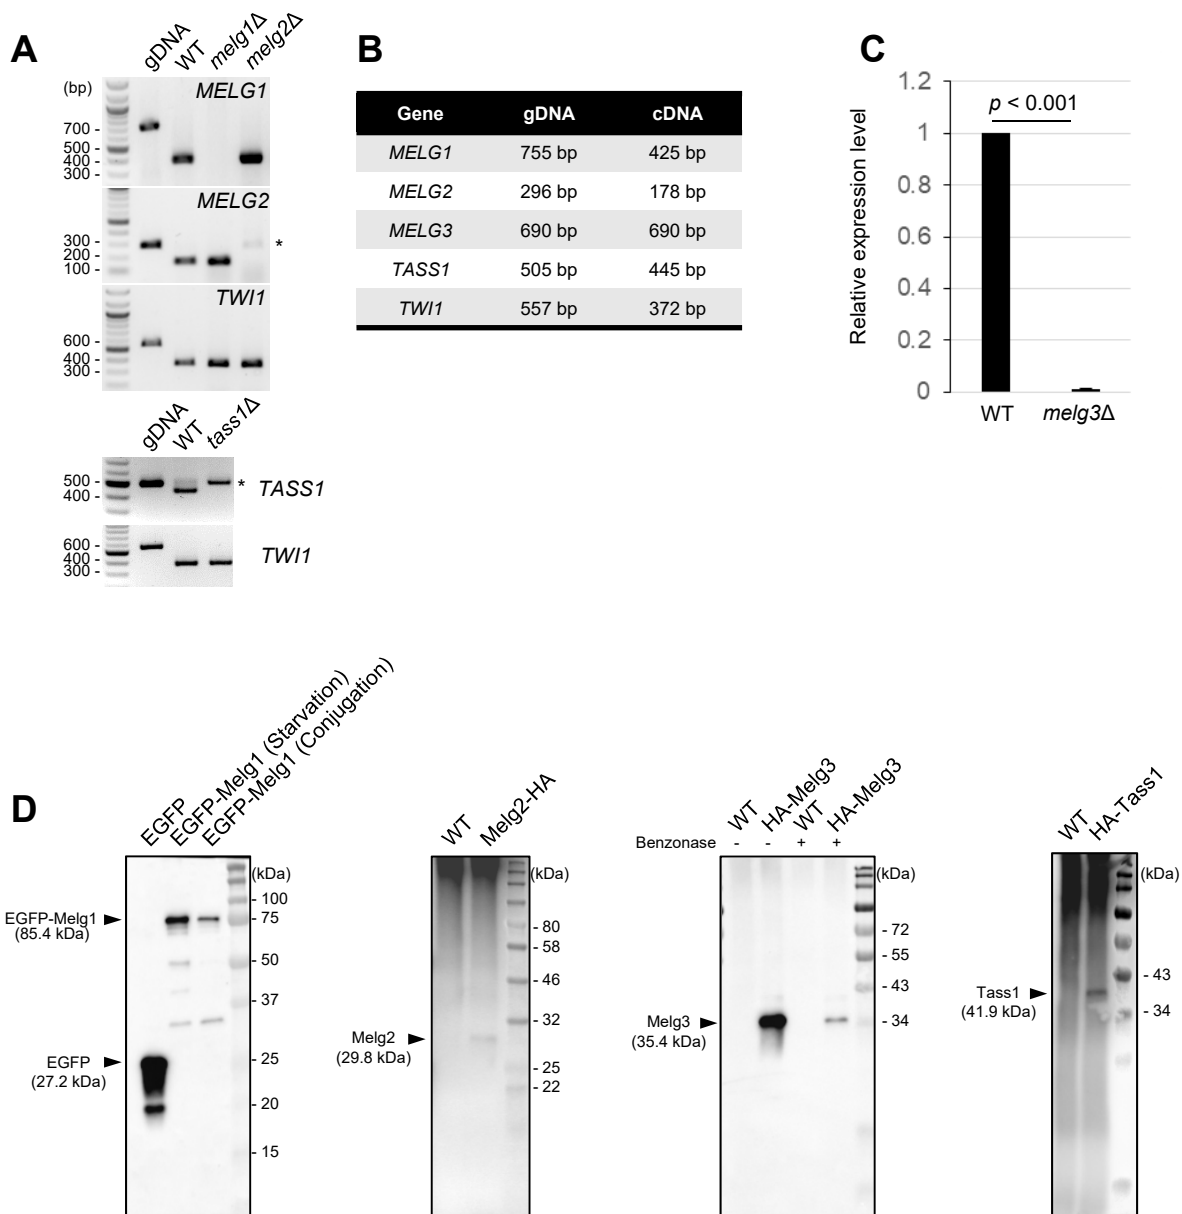

**Figure S5. RT-PCR analysis of gene expression in wild-type, *melg1* $\Delta$ , *melg2* $\Delta$ , *melg3* $\Delta$ , and *tass1* $\Delta$  cells, and confirmation of IP experiments.** (A) Expression of *MELG1*, *MELG2*, *TASS1*, and *TWI1* (control) was investigated by RT-PCR, using cDNA samples generated from total RNAs of wild-type (WT), *melg1* $\Delta$ , *melg2* $\Delta$ , and *tass1* $\Delta$  cells four hours after induction of meiosis. Total RNA samples were treated with DNase before reverse transcription; primer pairs that bind to adjacent exons were used for PCR. PCR products amplified from *Tetrahymena* genomic DNA (gDNA) were used as controls for the size of intron-containing DNA fragments. Asterisks indicate the presence of residual genomic DNA after DNase treatment in *melg2* $\Delta$  and *tass1* $\Delta$  samples. (B) PCR product sizes. *TWI1* served as a control for the correct staging of samples. (C) For intron-free *MELG3*, the reduction of expression was determined by RT-qPCR. (D) Western blotting of EGFP-Melg1, Melg2-HA, HA-Melg3, and HA-Tass1 IP samples. Proteins were detected with either anti-EGFP or anti-HA antibody.

**Table S1. Formulas for calculating probabilities of ring bivalents, rod bivalents and univalent pairs.**

The formulas give approximative probabilities of rings, rods and univalents for a given number of non-interfering crossovers (COs), which occupy chromosome arms randomly. (For simplicity, it is assumed that arm lengths are of equal lengths and probabilities of the two arms of a chromosome are independent. Because of the latter assumption, formulas do not work for low CO numbers.)

X....Number of CO (crossovers)

C....Number of chromosomes (*Tetrahymena*: C=5)

A....Number of Chromosome arms (*Tetrahymena*: A=10)

| Explanations                                                                                                                                                                                                                                                                                                                                                | Auxiliary formulas                                                     | Probabilities                                   |
|-------------------------------------------------------------------------------------------------------------------------------------------------------------------------------------------------------------------------------------------------------------------------------------------------------------------------------------------------------------|------------------------------------------------------------------------|-------------------------------------------------|
| Probability of each chromosome to get a CO if exactly 1 CO occurs in the cell:<br>Therefore, the probability of a certain chromosome not to obtain a CO is:<br>The probability of not getting a CO (remaining univalent) if X COs occur in the cell is:                                                                                                     | $P_{hit}=1/C$<br>$P_{no\ hit}=1-1/C$                                   | $P_{Univ}=(1-1/C)^X$                            |
| The probability of a certain arm of not getting a CO is:<br>The probability of the other arm of the same chromosome not getting a CO is:<br>From this follows the probability of a rod bivalent, namely the probability that one arm gets 0 COs and the other arm does not get 0 COs:<br>(multiplication by 2 because one or the other arm can be affected) | $P_{arm}=(1-1/A)^X$<br>$P_{other\ arm}=(1-1/A)^X \times (1-(1-1/A)^X)$ | $P_{Rod}=(1-1/A)^X \times 1-(1-1/A)^X \times 2$ |
| The probability of a ring bivalent is:                                                                                                                                                                                                                                                                                                                      |                                                                        | $P_{Ring}=1- P_{Rod}- P_{Univ}$                 |

The observed frequencies of 95.8% rings, 3.7% rods and 0.5% univalents counted in the WT ( $n=400$  configurations pooled from (Shodhan et al., 2017) and present counts - Fig. 3 B) are most compatible with an average of 37 COs per cell, calculated to produce 96.0% rings, 4.0% rods and <0.1% univalents. The observed frequencies of configurations for *melg1Δ melg2Δ* and *melg3Δ* (Fig. 3 B) fit best with 27, 0.5 and 22 COs per cell, respectively.

**Table S2. Melg1, 2, 3 and Tass1 partners identified by co-immunoprecipitation followed by mass spectrometry**

[Click here to Download Table S2](#)

**Table S3. List of primers**

| Primer_ID | Primer name            | Primer sequence (5'->3'; adapter sequences for ligation are labelled in red) |
|-----------|------------------------|------------------------------------------------------------------------------|
| #1        | Melg1_5UTRf1574_SacG   | <b>ACTAAAGGGAACAAAAGCTGGAGCTC</b> ATGAAATGAAAGATATTATCAGAAG                  |
| #2        | Melg1_5UTRr2244_PstG   | <b>ACCCGTCAGGTGCCTGGTACTGCAG</b> TTAATTTAATGGAAACAAGCTATC                    |
| #3        | Melg1_CDSf3589_XhoG    | <b>ACGTCGCACCATGTCGACCTCGAG</b> CAAAAACTATGGAGAGCTTCAC                       |
| #4        | Melg1_CDSr4249_KpnG    | <b>CTCACTATAGGGCGAATTGGGTACC</b> TCTTACACCAGCTTTAGTTATCTAG                   |
| #5        | Melg2_5UTRf944_SacG    | <b>ACTAAAGGGAACAAAAGCTGGAGCTC</b> TTGTCCAAGCATTTATAATACAAC                   |
| #6        | Melg2_5UTRr1902_PstCG  | <b>ACCCGTCAGGTGCCTGGTACTGCAG</b> ACTGCAATCTTGTTAAATATCTAAG                   |
| #7        | Melg2_3UTRf3038_XhoGK  | <b>ACGTCGCACCATGTCGACCTCGAG</b> ATAAATATCTATGAACTCAAAGCAC                    |
| #8        | Melg2_3UTRr3715_KpnG   | <b>CTCACTATAGGGCGAATTGGGTACC</b> ATTCTATTAECTTATCACTAATAGCG                  |
| #9        | Melg3_5UTRfv1_SacG     | <b>ACTAAAGGGAACAAAAGCTGGAGCTC</b> AATCAATCTACTTCTATTTGTTTTG                  |
| #10       | Melg3_5UTRrv1_PstCG    | <b>ACCCGTCAGGTGCCTGGTACTGCAG</b> AACTAAATCATTAATAAGAAATTCC                   |
| #11       | Melg3_3UTRfv1_XhoGK    | <b>ACGTCGCACCATGTCGACCTCGAG</b> ACATGATATTTTTATTTAGCAATTAC                   |
| #12       | Melg3_3UTRrv1_KpnG     | <b>CTCACTATAGGGCGAATTGGGTACC</b> ATTAATTAACAGATTCTTGCTTC                     |
| #13       | Tass1_5UTRf1004        | <b>ACTAAAGGGAACAAAAGCTGGAGCTC</b> AATAACAACCTAAGCCATTCTC                     |
| #14       | Tass1_5UTRr1670        | <b>ACCCGTCAGGTGCCTGGTACTGCAG</b> TTATGGATAGTTTAGTTCAATTTTTTC                 |
| #15       | Tass1_3UTRf2892        | <b>ACGTCGCACCATGTCGACCTCGAG</b> AGATAGTAGTTTAAATTATACTAAGAAAG                |
| #16       | Tass1_3UTRr3630        | <b>CTCACTATAGGGCGAATTGGGTACC</b> TTTACTATCAATTAAGTGAAATTTTAG                 |
| #17       | Melg2_coDel_fv1        | <b>CTTTATTGTTATCATCTTATGACCGC</b> GATGTAGCTCATGAGCTCAG                       |
| #18       | Melg2_coDel_rv1        | <b>CTCATCAAGTTGTAATGCTAAAATGC</b> AATAGAGGAGTGAGGAAGCG                       |
| #19       | Bamh-Melg1_CDSfv1      | <b>TGGTATGGATGAATTATATAAGGGATCC</b> ATGTTGGAATATAACTTAAAGAAATATG             |
| #20       | Kpn-Melg1_CDSrv1       | <b>CTCACTATAGGGCGAATTGGGTACC</b> AACCTCACTTGTGACTTAATTGTG                    |
| #21       | Melg2_CDSqf2237        | TAGTTTATTCTTATGCATGCTAGAG                                                    |
| #22       | Melg2_CDSqr2532        | AATCTGATTACCCTAAATCGTAG                                                      |
| #23       | Melg3_CDSfv1           | <b>ACTAAAGGGAACAAAAGCTGGAGCTC</b> AAAGATATCTGGTATTAAGTAACTGAG                |
| #24       | Melg3_NHA_OErv1        | <b>CTCAACTAGT</b> TATTAATTTTAAATAAGTAGGAAGAAC                                |
| #25       | Tass1_Cdsqfv1          | TGTTAATGTAGTTTATCTAAAGTAGC                                                   |
| #26       | Tass1_NHAOErv1         | <b>CTCAACTAGT</b> TCACTGTTATAAATATTTTTATCTTATTTACATC                         |
| #27       | Twi1_CDSf3018          | TTTAGCAAGTTTATGAATAAGCTC                                                     |
| #28       | Twi1_CDSr3574          | TAATAGTGTAGTGAGTAGGAGAAGC                                                    |
| #29       | Melg2_CDSf2237_SacG    | <b>ACTAAAGGGAACAAAAGCTGGAGCTC</b> TAGTTTATTCTTATGCATGCTAGAG                  |
| #30       | Melg2_CDSr2965_BamG    | <b>TCTTCACCCTTAGAAACCATGGATCC</b> ATTATTAAGTAGCTTTTAGTTGCGTC                 |
| #31       | Melg2_3UTRf3038_XhoGT  | <b>GCTTATCGATACCGTCGACCTCGAG</b> ATAAATATCTATGAACTCAAAGCAC                   |
| #32       | Melg3_CDSfv1_SacG      | <b>ACTAAAGGGAACAAAAGCTGGAGCTC</b> AAAGATATCTGGTATTAAGTAACTGAG                |
| #33       | Melg3_CDSrv1_BamG      | <b>TCTTCACCCTTAGAAACCATGGATCC</b> TATTAATTTTAAATAAGTAGGAAGAAC                |
| #34       | Melg3_3UTRfv1_XhoG     | <b>GCTTATCGATACCGTCGACCTCGAG</b> ACATGATATTTTATTTAGCAATTAC                   |
| #35       | Melg1_5UTRr2244_Sal1n5 | <b>TCCATACTTTGAAGATATCAAGTCGAC</b> TTAATTTAATGGAAACAAGCTATC                  |
| #36       | Melg3_NHA_OEfv1        | <b>ATGCTGGATCC</b> ATGGATTAATAGAATATGAGTTTTTC                                |
| #37       | Tass1_NHAOEfv1         | <b>ATGCTGGATCC</b> ATGAACTAACTATCCATAATATCTATAATAATATG                       |
